# Supplementary material for: Reactive microglia and mitochondrial unfolded protein response following ventriculomegaly and behavior defects in kaolin-induced hydrocephalus
Source: PubMed Central journal article supplement — BMB Rep. 2022 Apr 30;55(4):181–6. doi: 10.5483/BMBRep.2022.55.4.126 (PMC9058473; doi:10.5483/bmbrep.2022.55.4.126), 2022-04-30
Supplement: bmb-55-4-181-supple.pdf [file bmb-55-4-181-supple.pdf]

1 **Title:** Reactive microglia and mitochondrial unfolded protein response  
2 following ventriculomegaly and behavior defects in kaolin-induced  
3 hydrocephalus

4

5 Jiebo Zhu<sup>1,2,3,#</sup>, Min Joung Lee<sup>1,2,3,#</sup>, Hee Jin Chang<sup>1,4</sup>, Xianshu Ju<sup>1,3</sup>, Jianchen Cui<sup>1,3</sup>, Yu Lim  
6 Lee<sup>1,3</sup>, Dahyun Go<sup>1,2,3</sup>, Woosuk Chung<sup>1,5,6</sup>, Eungseok Oh<sup>1,4,\*</sup>, Jun Young Heo<sup>1,2,3,\*</sup>

7

8 <sup>1</sup>Department of Medical Science, Chungnam National University School of Medicine, South  
9 Korea

10 <sup>2</sup>Department of Biochemistry, Chungnam National University School of Medicine, South  
11 Korea

12 <sup>3</sup>Infection Control Convergence Research Center, Chungnam National University School of  
13 Medicine, South Korea

14 <sup>4</sup>Department of Neurology, Chungnam National University Hospital, South Korea

15 <sup>5</sup>Department of Anesthesiology and Pain Medicine, Chungnam National University School  
16 of Medicine, South Korea

17 <sup>6</sup>Department of Anesthesiology and Pain Medicine, Chungnam National University  
18 Hospital, South Korea

19

20 **Running Title:** Reactive microglia and UPRmt in hydrocephalus

21 **Keywords:** hydrocephalus, UPRmt, microglia, neuroinflammation

22 \*Corresponding authors: Jun Young Heo, **Tel: +82-42-580-8221; Fax: +82-42-580-8121;**  
23 **E-mail: [junyoung3@gmail.com](mailto:junyoung3@gmail.com);** Eungseok Oh, **Tel: +82-42-280-7868; Fax: +82-42-**  
24 **252-8654; E-mail: [doctor\\_oh@daum.net](mailto:doctor_oh@daum.net)**

25

26 #These authors have contributed equally to this work.

## 27 SUPPLEMENTAL MATERIALS

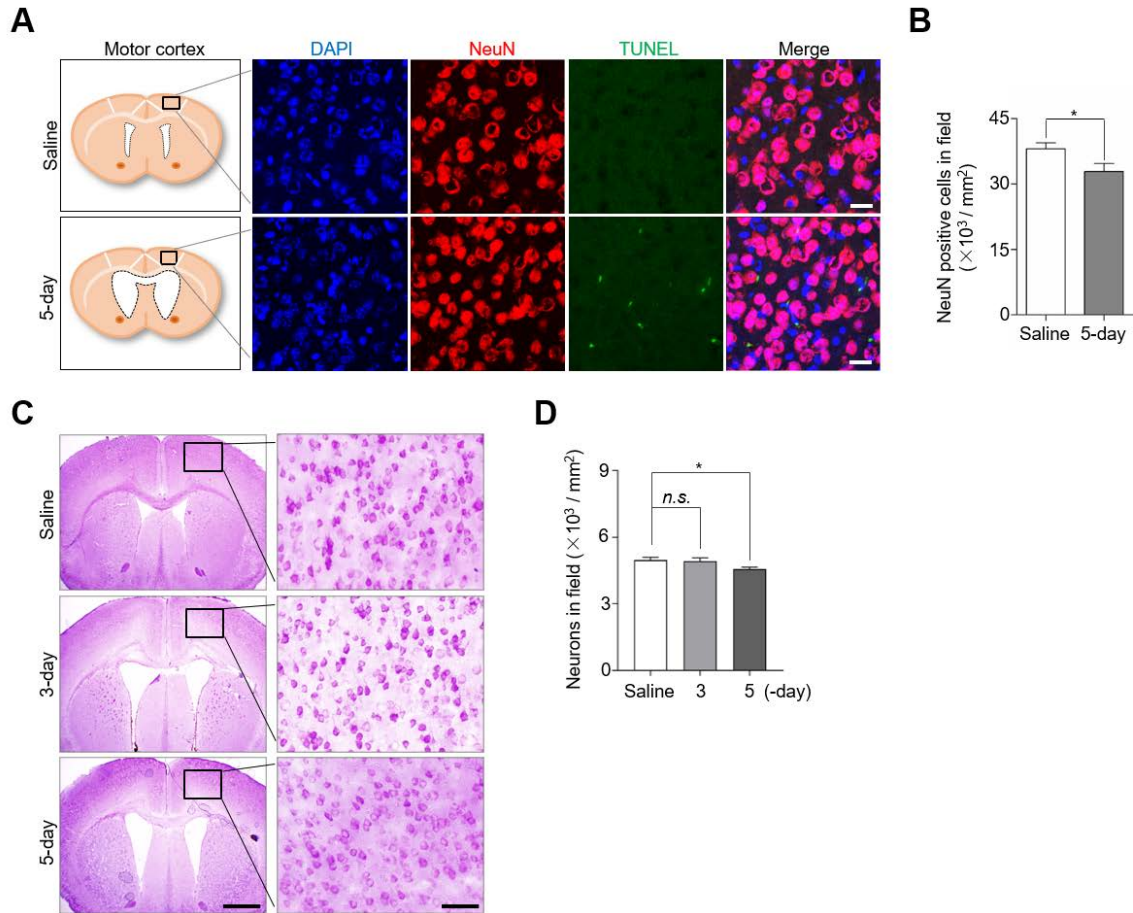

28

29 **Supplemental fig. 1.** The percentage of apoptotic neurons increased in the 5-day kaolin  
 30 group. (A) The motor cortex above the ventricles was stained for DAPI (blue), NeuN (red),  
 31 and TUNEL (green). (B) The NeuN positive cells in field were quantified,  $n = 6$ . (C) The  
 32 motor cortex above the ventricles was stained by Nissl. (D) The neurons in field were  
 33 quantified,  $n = 3$  (\*  $P < 0.05$ ; n.s., not significant). Scale bar: A:  $20 \mu\text{m}$ , C:  $200 \mu\text{m}$ , the  
 34 enlarged images:  $36 \mu\text{m}$ .

35

36

37

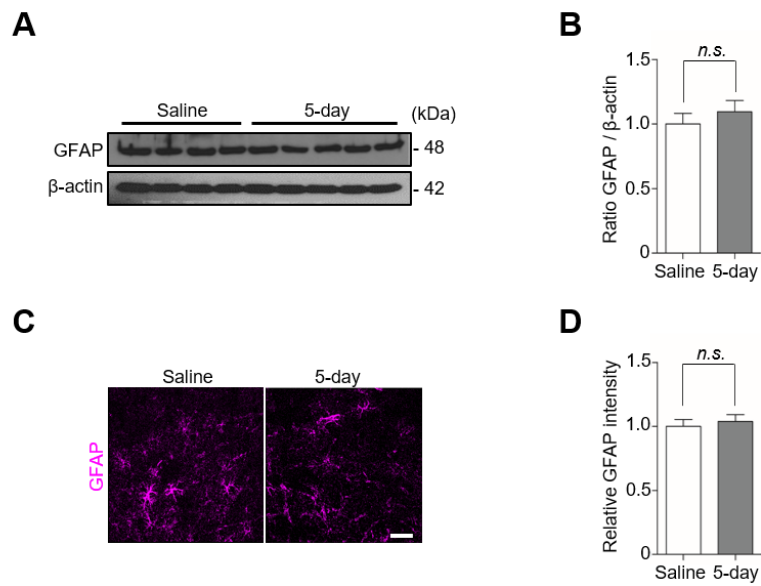

39

40 **Supplemental fig. 2.** The expression of astrocyte was not changed in the 5-day kaolin  
 41 group. (A) The expression of GFAP in the motor cortex was analyzed by western blotting.  
 42 (B) The intensity value of GFAP was shown. (C) The motor cortex was stained for the  
 43 marker of astrocyte GFAP. (D) The immunofluorescence intensity of GFAP was quantified.  
 44 Western blotting n (saline) = 4, n (5-day) = 5, immunofluorescence n = 5 (n.s., not  
 45 significant). Scale bar: 20  $\mu$ m.

46

47

48

49

50

51

52

53

54

55

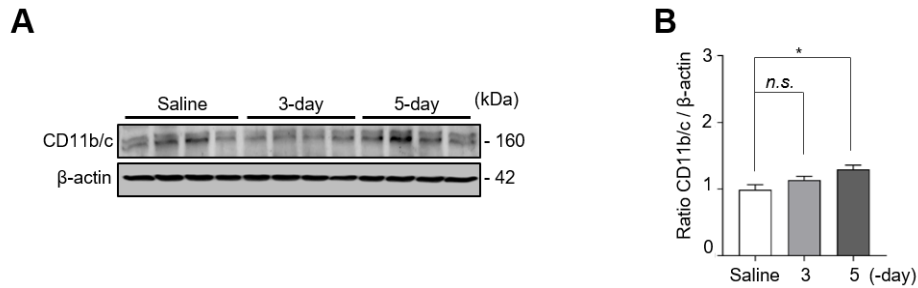

56 **Supplemental fig. 3.** Microglia activated in the 5-day kaolin group. (A) The expression of  
 57 CD11b/c in the motor cortex was analyzed by western blotting. (B) The intensity value of  
 58 CD11b/c was shown,  $n = 4$  (\*  $P < 0.05$ ; n.s., not significant).

59

60

61

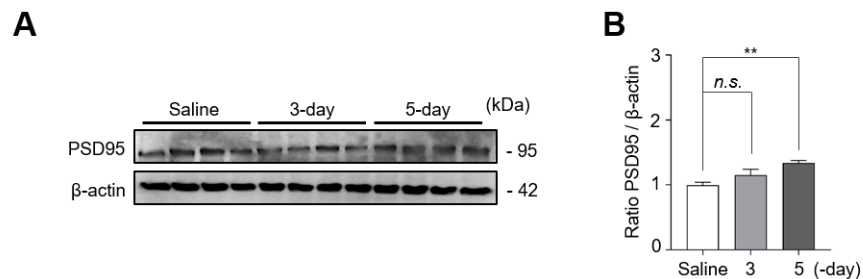

62

63 **Supplemental fig. 4.** PSD95 upregulated in the 5-day kaolin group. (A) The expression of  
 64 PSD95 in the motor cortex was analyzed by western blotting. (B) The intensity value of  
 65 PSD95 was shown,  $n = 4$  (\*\*  $P < 0.01$ ; n.s., not significant).

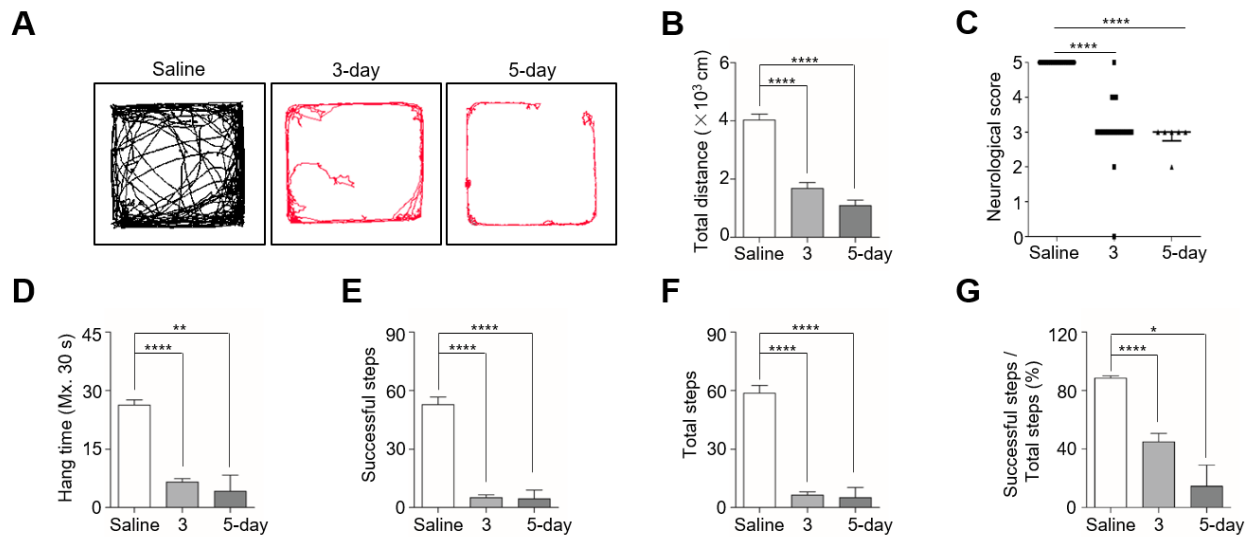

66

67 **Supplemental fig. 5.** Kaolin-induced hydrocephalus mice show motor disturbances in both  
 68 3-day and 5-day groups. (A, B) Movement activity was measured for 10 min in the open-  
 69 field test. (C) The neurological function was scored by a 5-point paradigm and plotted.  
 70 (D - G) Bar plots showed the results were calculated for 30 s in a horizontal grid test.  
 71 Behavior test n (saline) = 16, n (3-day) = 24, and n (5-day) = 6. For the neurological score,  
 72 n (3-day) = 24. For the open-field test and horizontal grid test, n (3-day) = 23 (\* P < 0.05,  
 73 \*\* P < 0.01, \*\*\*\* P < 0.0001).

74

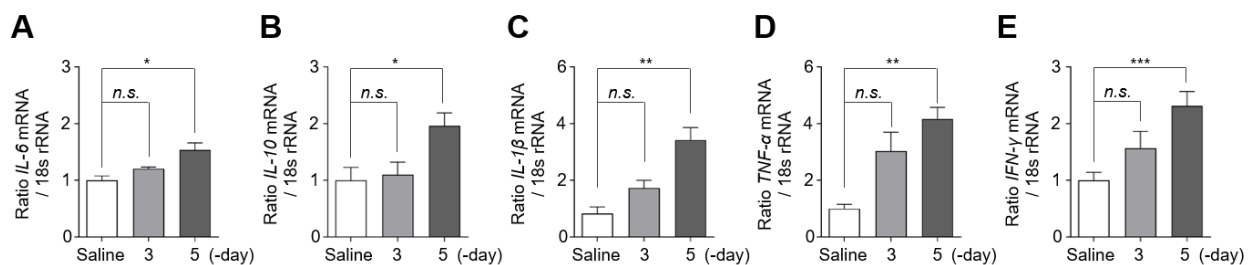

75

76 **Supplemental fig. 6.** Inflammatory cytokines expression increased in the 5-day kaolin  
 77 group. (A - E) The expression of *IL-6*, *IL-10*, *IL-1β*, *TNF-α*, and *IFN-γ* in the motor cortex  
 78 was analyzed by qPCR, n = 4 (\* P < 0.05, \*\* P < 0.01, \*\*\* P < 0.001; n.s., not significant).

79

## 80 MATERIALS AND METHODS

81

### 82 Animals

83 Eight weeks old male C57BL/6J mice (Damul Science, Daejeon, Korea), provided with a  
84 standard chow diet (Research Diets, AIN-76A, New Brunswick, NJ, USA) and water *ad*  
85 *libitum*. Mice were maintained at 22°C, 12 h light/dark cycle (light phase: 6:00 to 18:00,  
86 dark phase: 18:00 to 6:00). All the experimental procedures were approved by the  
87 Institutional Animal Care and Use Committee of Chungnam National University (ethical  
88 approval number, 202103A-CNU-022).

89

### 90 Mice model of kaolin-induced hydrocephalus

91 The mouse head was fixed in the stereotactic frame (KOPF, CA), anesthetized with 2.5%  
92 sevoflurane (Ilsung, Seoul, Korea) in an O<sub>2</sub> air mixture (2:1) delivered by loosely snout  
93 mask, anesthesia was verified by touching the footpad. Wipers tissue to protect mouse  
94 eyes, 70% ethanol sterilized mouse head. Followed midline made 1 cm incision, separated  
95 the soft tissue and muscle, exposed the cisterna magna. In the saline group, cisterna  
96 magna was injected with 10  $\mu$ L saline. In the kaolin group, cisterna magna was injected  
97 with 10  $\mu$ L 25% kaolin (250 mg/mL in saline; Sigma, K7375), through a 0.5 mL insulin  
98 syringe (Becton-Dickinson, 328821). After surgery, mice have sutured the muscle and  
99 skin, allowed to recover from anesthesia on a heated surface for 30 min. Returned the mice  
100 to their cages, kept them at room temperature, and provided them with standard chow  
101 and water *ad libitum*.

102

### 103 Measurement of ventricular size

104 Mice were randomly divided into 3 experimental groups, 6 mice per group: (a) saline group  
105 (the fifth day after 10  $\mu$ L saline injection), (b) 1-day group (the first day after 10  $\mu$ L 25%

106 kaolin injection), (c) 3-day group (the third day after 10  $\mu$ L 25% kaolin injection), and (d)  
107 5-day group (the fifth day after 10  $\mu$ L 25% kaolin injection). All the mice were euthanized  
108 with sevoflurane and then brains were collected. Mice brains were immersed in 4%  
109 paraformaldehyde for 48 h and dehydrated in 30% sucrose solution at 4°C for another 48  
110 h. Then samples were frozen and sliced into coronal sections, from the anterior horn of the  
111 lateral ventricle (Lv) to the 4th ventricle (4v), the thickness of 100  $\mu$ m using a cryotome  
112 (Leica). Slices were mounted on glass slides and imaged at 20 magnifications under a  
113 microscope (Olympus, Japan). The size of the Lv, the dorsal part of the 3rd ventricle (d3v),  
114 the ventral part of the 3rd ventricle (v3v), and the 4v were analyzed by the Image J  
115 software.

116

## 117 **Behavioral analysis**

118 Mice were randomly divided into 2 experimental groups: (a) 16 mice in the saline group  
119 (the third day after 10  $\mu$ L saline injection), (b) 24 mice in the 3-day group (the third day  
120 after 10  $\mu$ L 25% kaolin injection), and (c) 6 mice in the 5-day group (the fifth day after 10  
121  $\mu$ L 25% kaolin injection). Mice were handled 3 days before behavioral tests, to reduce the  
122 effects that handling stress might have on the tests. All tests were carried out from 9:00 to  
123 18:00 during the light phase, in the same low-intensity lightroom, and analyzed by the  
124 same experimenter. After the test, mice were returned to their cage and the boxes were  
125 cleaned with 70% ethanol. EthoVision XT 11.5 software to analyze the mice behavior.

126

## 127 **Open-field test**

128 The general activity was recorded by placing the mice in a 40  $\times$  40  $\times$  40 cm box for 10 min.  
129 To start the test, a mouse was placed at the center of the box. And the travel distance was  
130 recorded.

131

132

**133 Neurological score**

134 Mice were scored for global neurologic function, using a modified neurological scale as  
135 follows: normal (5), decreased scavenging activity and scatter reflex (4), no spontaneous  
136 scavenging, loss of scattering reflex, ataxia (3), non-purposeful movements (2), loss of  
137 righting reflex (1), dead (0) (1).

138

**139 Horizontal grid test**

140 The hang time, successful steps, and total steps were recorded, by placing the mouse in a  
141 12 × 12 cm horizontal square grid box. The box includes the bottom clear plexiglass walls,  
142 a height of 20 cm. The top black plexiglass walls, the height of 8 cm, with 0.8 × 0.8 cm wire  
143 mesh. Placed the grid side on the floor, put the mouse in the box. When the mouse grabbed  
144 the grids with four paws, the box inverted slowly, the mouse would hang on the grid. The  
145 camera recorded for 30 s and replayed the videos for analysis.

146

**147 Immunofluorescence**

148 Mice were randomly divided into 2 experimental groups, 6 mice per group: (a) saline group  
149 (the fifth day after 10  $\mu$ L saline injection) and (b) 5-day group (the fifth day after 10  $\mu$ L  
150 25% kaolin injection). All the mice were euthanized with sevoflurane and then brains were  
151 collected. Mice were perfused and fixed with 4% paraformaldehyde and dehydrated with  
152 30% sucrose solution at 4°C for 48 h. Then samples were frozen and sliced into coronal  
153 sections, at a thickness of 30  $\mu$ m using a cryotome. The sections were stored in tissue stock  
154 solution and blocked in 2% donkey serum (Gene Tex), 0.3% Triton X-100 with phosphate-  
155 buffered saline (PBS) for 1.5 h and then incubated with anti-TNF- $\alpha$  (1:100; Abcam,  
156 ab6671), ionized calcium-binding adaptor molecule-1 (Iba-1) (1:200; Novus Biologicals,  
157 NB100-1028), GFAP (1:600, Abcam, 4674), at 4°C overnight. Washed with PBS, and  
158 incubated Alexa Fluor® 488 AffiniPure Donkey Anti-Rabbit IgG (H+L) (1:100; Jackson  
159 Immuno, 711-545-152), Alexa Fluor® 594 AffiniPure Donkey Anti-Goat IgG (H+L) (1:200;



160 Jackson Immuno, 705-585-147), Alexa Fluor® 647 AffiniPure Donkey Anti-Chicken IgG  
161 (H+L) (1:600; Jackson Immuno, 703-605-155) for 1.5 h at room temperature, Hoechst  
162 33342 Trihydrochloride (1:5000; MedChemExpress, HY-15559A) for 3 min at room  
163 temperature. Using fluorescent mounting solution (Dako) mounted tissue on slides,  
164 imaged by the confocal microscope (Leica). Fluorescence integrated density (IntDen) was  
165 quantified with the Image J software.

166

### 167 **ELISA measurements**

168 Mice were randomly divided into 4 experimental groups, 6 mice per group: (a) saline group  
169 (the fifth day after 10  $\mu$ L saline injection), (b) 1-day group (the first day after 10  $\mu$ L 25%  
170 kaolin injection), (c) 3-day group (the third day after 10  $\mu$ L 25% kaolin injection), and (d)  
171 5-day group (the fifth day after 10  $\mu$ L 25% kaolin injection). All the mice were euthanized  
172 with sevoflurane and then brains were collected. The motor cortex above the ventricles  
173 was homogenized in 200  $\mu$ L PBS, centrifuged at 3000 rpm for 5 min at 4 °C. The  
174 supernatants were stored at -70°C until performed mouse TNF- $\alpha$  enzyme-linked  
175 immunosorbent assay (ELISA) (KOMA, K0331186) according to the manufacturer's  
176 instructions.

177

### 178 **Western blotting**

179 Mice were randomly divided into 4 experimental groups, 3 mice per group: (a) saline group  
180 (the fifth day after 10  $\mu$ L saline injection), (b) 1-day group (the first day after 10  $\mu$ L 25%  
181 kaolin injection), (c) 3-day group (the third day after 10  $\mu$ L 25% kaolin injection), and (d)  
182 5-day group (the fifth day after 10  $\mu$ L 25% kaolin injection). All the mice were euthanized  
183 with sevoflurane and then brains were collected. The motor cortex above the ventricles  
184 was separated and lysed by radioimmunoprecipitation assay (RIPA) buffer with  
185 phosphatase inhibitor and protease inhibitor cocktail (Roche) to extract the protein. The  
186 extracted protein (each 20  $\mu$ g protein) was run on sodium dodecyl sulfate-polyacrylamide  
187 gel electrophoresis (SDS-PAGE) and then were transferred to polyvinylidene fluoride  
188 (PVDF) membrane (Millipore). The PVDF membranes were blocked with 2.5% bovine

189 serum albumin (BSA) (GenDEPOT) for 1 h at room temperature, then incubated 4°C,  
190 overnight with anti-TNF- $\alpha$  (1:1000; Abcam, ab6671), p65 (1:500; Cell Signaling  
191 Technology, 8242), phosphorylated p65 (P-p65) (1:500; Cell Signaling Technology,  
192 3033), Iba-1 (1:500; Novus Biologicals, NB100-1028), LONP1 (1:1000; Abcam, 103809),  
193 HSP60 (1:5000; Abcam, 46798), CLPP (1:1000; Sigma, HPA010649), PARP-1 (1:1000; Cell  
194 Signaling Technology, 9532), GFAP (1:5000, Abcam, 7260), CD11b/c (1:500, Neuromics,  
195 RA25012), PSD95 (1:2000, Thermo, MA1-046), and  $\beta$ -actin (1:2000; Santa Cruz  
196 Biotechnology, sc-47778) in 1% BSA. The PVDF membranes were washed with Tris-  
197 buffered saline with Tween (TBST) and incubated with secondary antibodies IgG  
198 horseradish peroxidase antibody (HRP, Pierce Biotechnology), for 1.5 h at room  
199 temperature. The protein band was visualized by the enhanced chemiluminescence (ECL)  
200 reagent (Thermo). Then used medical X-ray film blue (AGFA CP-BU NEW), developer  
201 solution, and fixer solution for the ECL detection. Band intensity was quantified with the  
202 Image J software.

203

#### 204 **TUNEL staining**

205 Mice were randomly divided into 2 experimental groups, 6 mice per group: (a) saline group  
206 (injected with 10  $\mu$ L saline as vehicle solution) and (b) 5-day group (the fifth day after 10  
207  $\mu$ L 25% kaolin injection). All the mice were euthanized with sevoflurane and then brains  
208 were collected. The brain tissues were embedded in 4% paraformaldehyde, dehydrated  
209 brain sections were stained with terminal-deoxynucleotidyl transferase-mediated nick  
210 end labeling (TUNEL) assay (Roche, 11684795910) according to the manufacturer's  
211 instructions. Double-label with neuronal nuclear antigen (NeuN) (1:200; Abcam,  
212 ab104224). Finally, the sections were covered with 4'6-diamidino-2-phenylindole (DAPI)  
213 (1:5000; Thermo, H3570). The slides were imaged using the confocal microscope (Leica).  
214 Fluorescence IntDen was quantified with the Image J software.

215

216

## 217 Nissl staining

218 Mice were randomly divided into 3 experimental groups, 3 mice per group: (a) saline group  
219 (injected with 10  $\mu$ L saline as vehicle solution), (b) 3-day group (the third day after 10  $\mu$ L  
220 25% kaolin injection), and (c) 5-day group (the fifth day after 10  $\mu$ L 25% kaolin injection).  
221 All the mice were euthanized with sevoflurane and then brains were collected. The brain  
222 tissues were embedded in 4% paraformaldehyde, dehydrated brain sections were stained  
223 with 0.1% cresyl violet for 3 min, dehydrated through graded alcohols (70, 95, 100%).  
224 Using fluorescent mounting solution (Dako) mounted tissue on slides, imaged by the  
225 confocal microscope (Leica). Neurons in field were quantified with the Image J software.

226

## 227 Quantitative Real-time PCR (qPCR)

228 Mice were randomly divided into 4 experimental groups, 3 mice per group: (a) saline group  
229 (the fifth day after 10  $\mu$ L saline injection), (b) 1-day group (the first day after 10  $\mu$ L 25%  
230 kaolin injection), (c) 3-day group (the third day after 10  $\mu$ L 25% kaolin injection), and (d)  
231 5-day group (the fifth day after 10  $\mu$ L 25% kaolin injection). Total RNAs were isolated by  
232 TRIzol reagent (Thermo) and cDNA was prepared with reverse transcription master  
233 premix (5  $\times$  Rnase H+). The qPCR was performed with cDNA, SYBR green PCR master mix  
234 (PhileKorea, Korea), and primers. *Lonp1* primer (Forward: 5'-  
235 GACAGAGAACCCGCTAGTGC-3', Reverse: 5'-CTCAGTGGTTCTGGGATGGT-3'), *Hspd1*  
236 primer (Forward: 5'-GAGCTGGGTCCCTCACTCG-3', Reverse: 5'-  
237 AGTCGAAGCATTCTGCGGG-3'), *Clpp* primer (Forward: 5'-GCCATTCACTGCCAATTCC-  
238 3', Reverse: 5'-TGCTGACTCGATCACCTGTAG-3'), *IL-6* primer (Forward: 5'-  
239 ACAACCACGGCCTTCCCTACTT-3', Reverse: 5'-CACGATTTCCCAGAGAACATGTG-3'), *IL-*  
240 *10* primer (Forward: 5'-ATAACTGCACCCACTTCCCA-3', Reverse: 5'-  
241 GGGCATCACTTCTACCAGGT-3'), *IL-1 $\beta$*  primer (Forward: 5'-  
242 TGACGGACCCCAAAGATGA-3', Reverse: 5'-AAAGACACAGGTAGCTGCCA-3'), *TNF- $\alpha$*   
243 primer (Forward: 5'-CCCACGTCGTAGCAAACCAC-3', Reverse: 5'-  
244 GCAGCCTTGTCCCTTGAAGA-3'), *IFN- $\gamma$*  primer (Forward: 5'-  
245 AGACATCTCCTCCCATCAGCAG-3', Reverse: 5'-TAGCCAAGACTGTGATTGCGG-3'), and  
246 *18s rRNA* primer (Forward: 5'-CGACCAAAGGAACCATAACT-3', Reverse: 5'-

247 CTGGTTGATCCTGCCAGTAG-3'). Results were analyzed with the Rotor-Gene 6000 real-  
248 time rotary analyzer system (Corbett Life Science).

249

### 250 **Statistical analysis**

251 All results are acquired from at least three independent experiments and are presented as  
252 the mean  $\pm$  SEM. Data were compared using a student's *t*-test or a one-way ANOVA  
253 (Prism software). P-values  $< 0.05$  were deemed statistically significant.

254

### 255 **Reference:**

- 256 1. Bloch O, Auguste KI, Manley GT and Verkman AS (2006) Accelerated progression of  
257 kaolin-induced hydrocephalus in aquaporin-4-deficient mice. *J Cereb Blood Flow*  
258 *Metab* 26, 1527-1537

259
